# Supplementary material for: Reported selection criteria for adult acquired flatfoot deformity and posterior tibial tendon dysfunction: Are they one and the same? A systematic review
Source: PubMed Central journal article supplement (PMC5711021; doi:10.1371/journal.pone.0187201), 2017-12-01
Supplement: pone.0187201.s002.pdf [file pone.0187201.s002.pdf]

**S1 Table.** Categories used in table 1

| Headings                     | Terms used in study inclusion and diagnostic criteria                                                                                                                                                                                                                                                                                                                 |
|------------------------------|-----------------------------------------------------------------------------------------------------------------------------------------------------------------------------------------------------------------------------------------------------------------------------------------------------------------------------------------------------------------------|
| Pain along PTT               | Pain over the tendon                                                                                                                                                                                                                                                                                                                                                  |
| Pain medial ankle/foot       | Posteromedial ankle pain, medial hindfoot pain, pain on medial aspect of arch of the foot, medial ankle pain                                                                                                                                                                                                                                                          |
| Tender on palpation PTT      | Palpable tenderness, tenderness over the tendon, pain on palpation of the PTT, tenderness along PTT, tenderness to palpation, pain reproduced on palpation of the PTT                                                                                                                                                                                                 |
| Pain with resisted inversion |                                                                                                                                                                                                                                                                                                                                                                       |
| Pain with SLHR               | Pain with unilateral heel rise, pain when rising onto toes while weightbearing,                                                                                                                                                                                                                                                                                       |
| Swelling along PTT           | Localized oedema, swelling over the tendon, local swelling, swelling along the course of PTT, swelling over tendon sheath, enlargement over the posterior tibial tendon,                                                                                                                                                                                              |
| Swelling medial ankle/foot   | Medial hindfoot swelling, swelling posteromedial aspect of ankle, swelling on medial aspect of arch of the foot, enlargement of the medial retromalleolar region,                                                                                                                                                                                                     |
| Inversion strength deficit   | Weakened inversion force, weakness of posterior tibialis, positive resistance test results, reduced or absent power of inversion, clinical strength deficit when tested with the foot in inversion and plantarflexion, weak strength upon supination on manual testing, inability to bring the foot across the midline from an abducted position, diminished power PT |
| Difficulty with SLHR         | Inability to perform SLHR, lack of active hindfoot inversion during SLHR, inability to do single-limb toe raises, difficulty lifting one foot                                                                                                                                                                                                                         |
| Decreased walking ability    | Difficulty ambulating, decreased ability to walk any distance, reduced walking distance                                                                                                                                                                                                                                                                               |
| Flatfoot deformity           | Acquired flatfoot deformity, planovalgus deformity, pes planovalgus                                                                                                                                                                                                                                                                                                   |
| Hindfoot valgus              | Heel valgus, rearfoot abduction, calcaneal valgus, hindfoot eversion, valgus angulation of the heel                                                                                                                                                                                                                                                                   |
| Medial arch collapse         | Flattening of medial longitudinal arch, midfoot collapse, loss of height in the arch, loss of longitudinal arch, loss in medial arch contour, arch collapse, flattened midfoot posture, fallen medial longitudinal arch                                                                                                                                               |
| Forefoot abduction           | Too many toes sign, varus forefoot, first metatarsal abduction, lateral deviation of the forefoot                                                                                                                                                                                                                                                                     |
| Midfoot abduction            | Abduction at the transverse tarsal joint, abducted midfoot posture                                                                                                                                                                                                                                                                                                    |
| Forefoot supination          |                                                                                                                                                                                                                                                                                                                                                                       |
| Flexible deformity           | Passively correctable deformity, flatfoot deformity with a mobile hindfoot, hindfoot valgus passively correctable, flexible pes planovalgus, manually correctable valgus deformity, non-fixed hindfoot valgus deformity, supple deformity, absence of rigid foot deformity, mobile mid- and hind-foot                                                                 |
| Talar head prominence        |                                                                                                                                                                                                                                                                                                                                                                       |
